# Supplementary material for: TRPV1 inhibition overcomes cisplatin resistance by blocking autophagy-mediated hyperactivation of EGFR signaling pathway
Source: PubMed Central journal article supplement (PMC10172196; doi:10.1038/s41467-023-38318-7), 2023-05-10
Supplement: 41467_2023_38318_MOESM1_ESM.pdf [file 41467_2023_38318_MOESM1_ESM.pdf]

**Title: Supplementary Data 1. The CESC patient's clinical characteristics.**

**Description:** Clinical characteristics of CESC patients from The Cancer Genome Atlas (TCGA) data organized in the Firehose BROAD GDAC data repository (<https://gdac.broadinstitute.org/>).
